# Supplementary material
Source: PubMed Central journal article supplement (PMC3142421)
Supplement: psb0603_0393SD1.pdf [file psb0603_0393SD1.pdf]

A

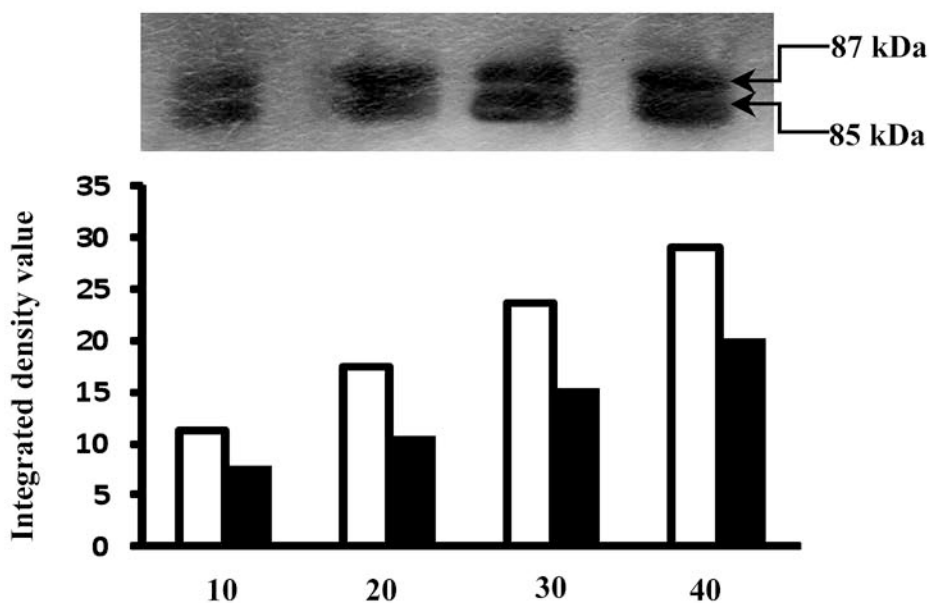

B

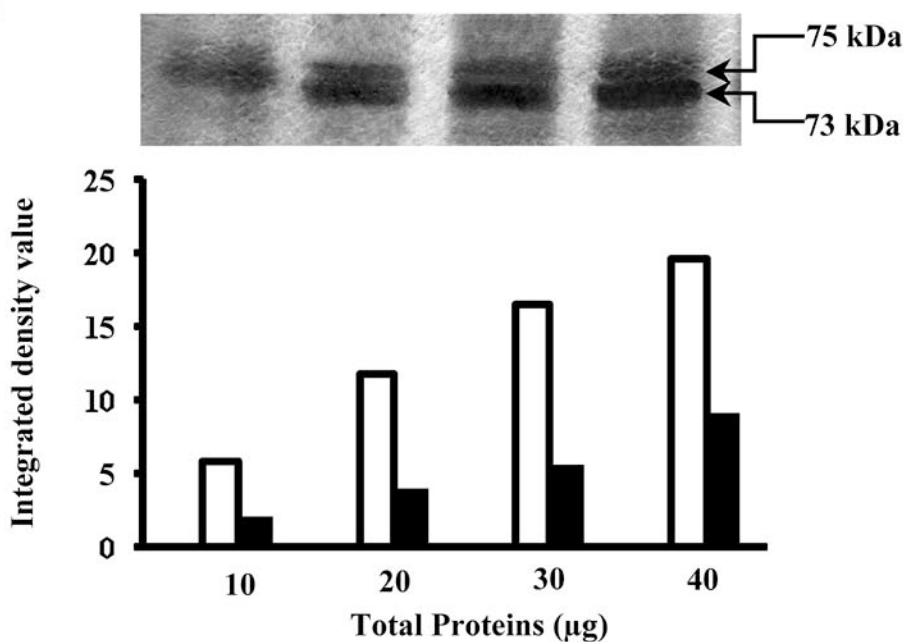

Supplementary Figure 1

Standard curves for quantification of Hsp87 and Hsp85 (A), and Hsp75 and Hsp73 (B). Total proteins from the 24 h-old seedlings, heat-shocked at 45°C for 3 h, were resolved on 6% SDS-PAGE, transferred on to Hybond C membrane and probed with anti-*N. crassa* Hsp80 and anti-*S. bicolor* Hsp70 polyclonal antibodies. Densitometer scanning shows the change in integrated density value of Hsp85 and Hsp73 (□), and Hsp87 and Hsp75 (■).
